# Supplementary material for: Exploration of COX-Like Activity in Wild-Type gp63 Recombinant Protein from Leishmania mexicana; Identification of Orthologous Proteins in Clinically Significant Parasites, and Investigation of Arachidonic Acid Binding Sites
Source: Preprints.org preprint supplement (doi:10.20944/preprints202407.2496.v1), 2024-07-31
Supplement: Supplementary file 1 [file supplementary]

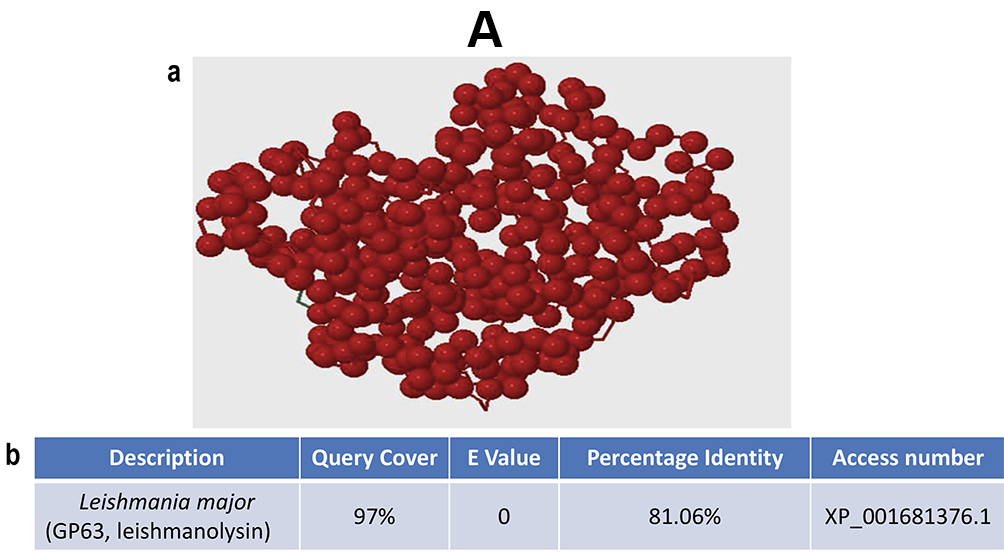


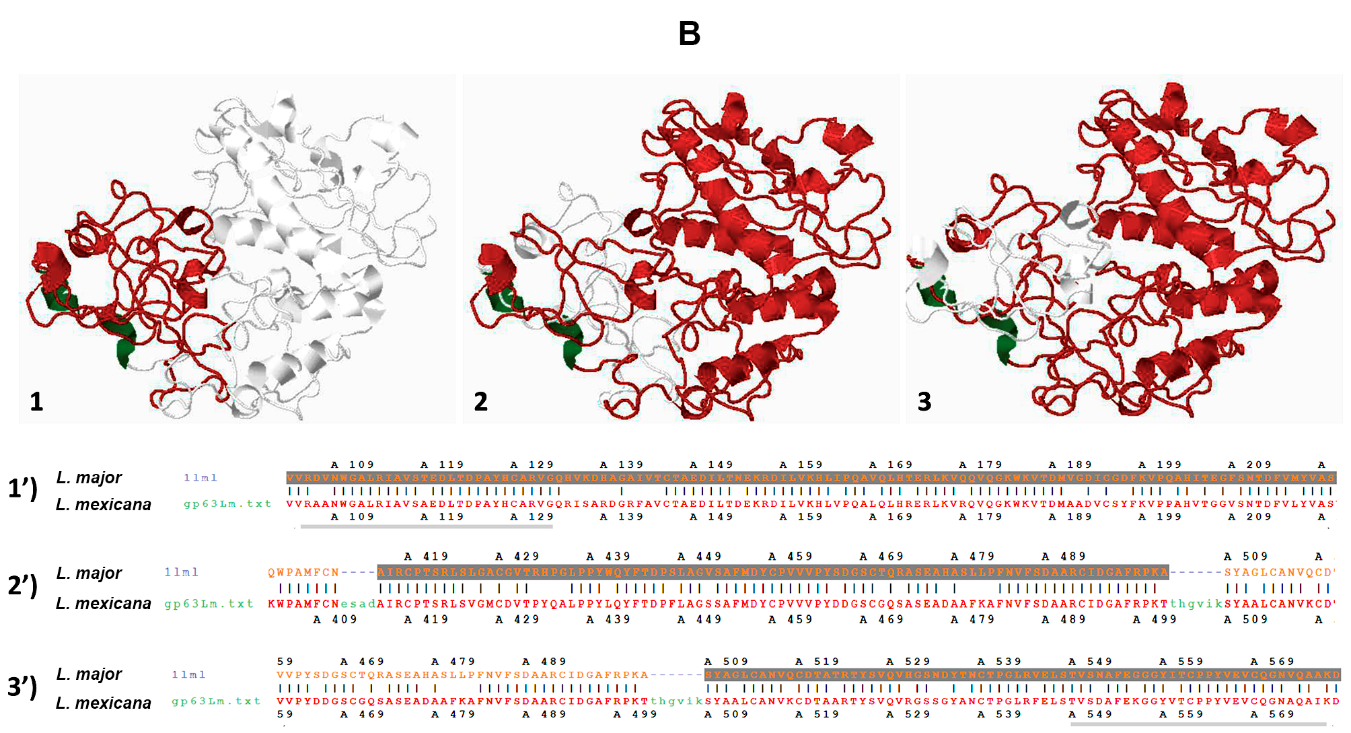


Supplementary Figure 1. Obtaining the 3D structure of gp63 from *L. mexicana*. In A, the top panels show analysis of regions of *L. mexicana* gp63 using L. major leishmanolysin as a template (shown in figures 1, 2 and 3). The identical area is shown in white. The lower panel shows the alignment of gp63 from *L. mexicana* and Leishmanolysina in *L. major*. In B (a), similarity of *L. mexicana* gp63 and *L. major* leishmanolysin is shown. The portion in green color illustrates the different sequences between both proteins and in red-orange the identical sequences. In B (b) the sequence alignment is illustrated, in B (c), the TopMach-web result, in which the parameters that establish the identity of both sequences are demonstrated. B (d) shows the Blast analysis corresponding to the analysis of gp63 from *L. mexicana* and leishmanolysin from *L. major*.
